# Supplementary material
Source: PubMed Central journal article supplement (PMC5093073)
Supplement: NIHMS813397-supplement-2.pdf [file NIHMS813397-supplement-2.pdf]

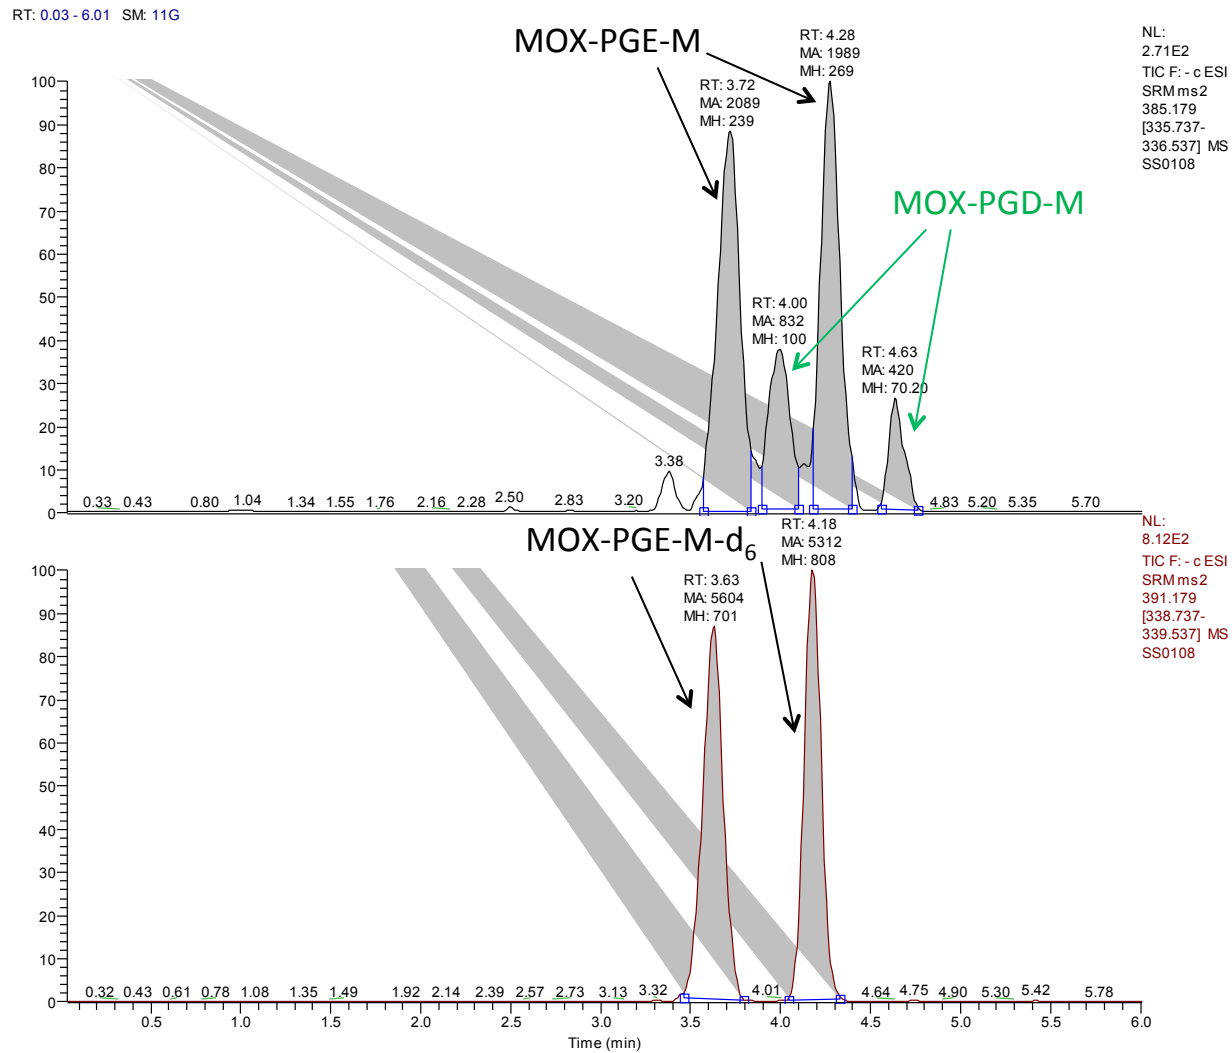

**Supplementary Figure S1.** LC/MS chromatograms of MOX-PGE-M, MOX-PGD-M and the internal standard MOX-PGE-M-d<sub>6</sub>. MOX-PGE-M is eluted 6 seconds later than its internal standard. As can be seen in the upper panel, the two peaks representing MOX-PGD-M are eluting 17 seconds after those of MOX-PGE-M in this chromatographic system.

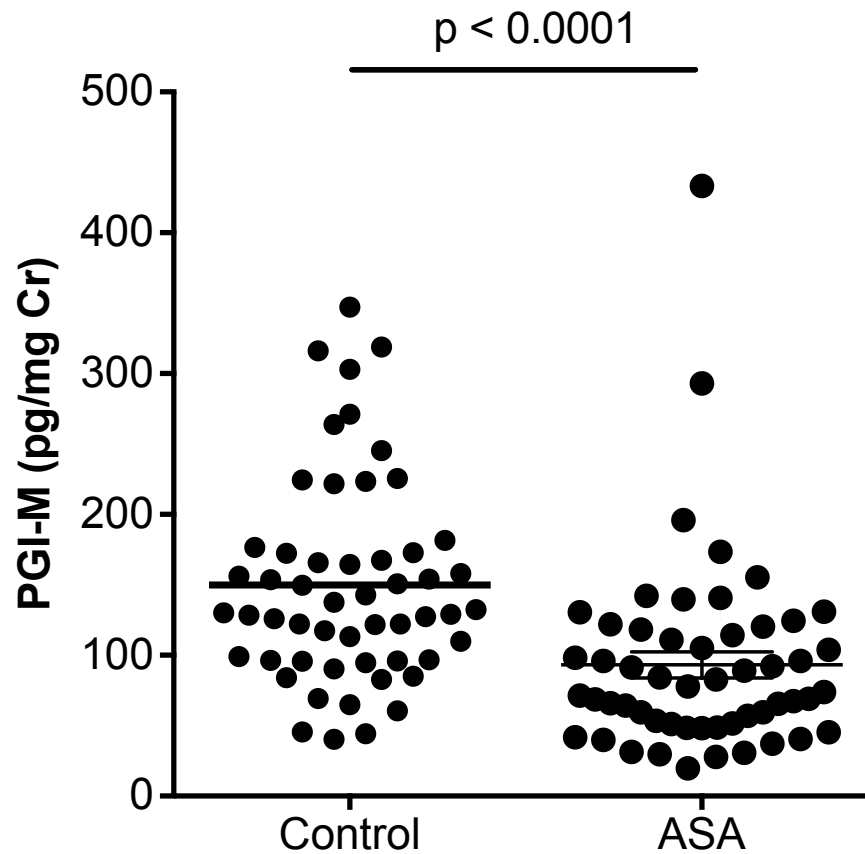

**Supplemental Fig S2.** Daily low dose aspirin inhibits prostacyclin biosynthesis in humans. 81 mg of aspirin was administered daily to healthy participants for 2 weeks. PGI-M, the urinary metabolite of prostacyclin, was measured by GC/MS before and after aspirin therapy. Paired analysis comparisons were performed using Wilcoxon-ranked tests. Low dose aspirin inhibited the biosynthesis of prostacyclin by 37% ( $p < 0.0001$ ,  $n = 64$ ).

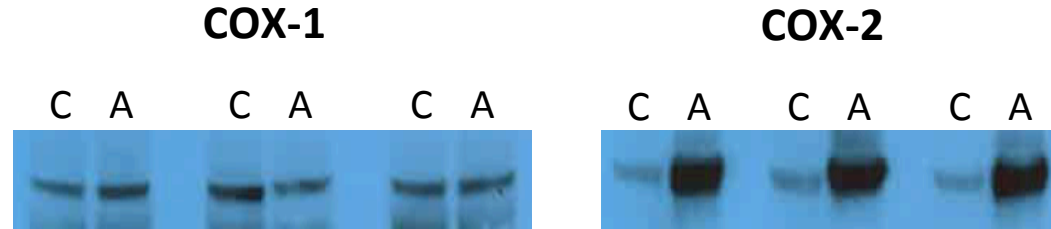

**Supplemental Fig S3.** Western blots analysis of COX-1 and COX-2 expression in A549 cells before and after cell activation with IL-1b 1 ng/ml. n = 3

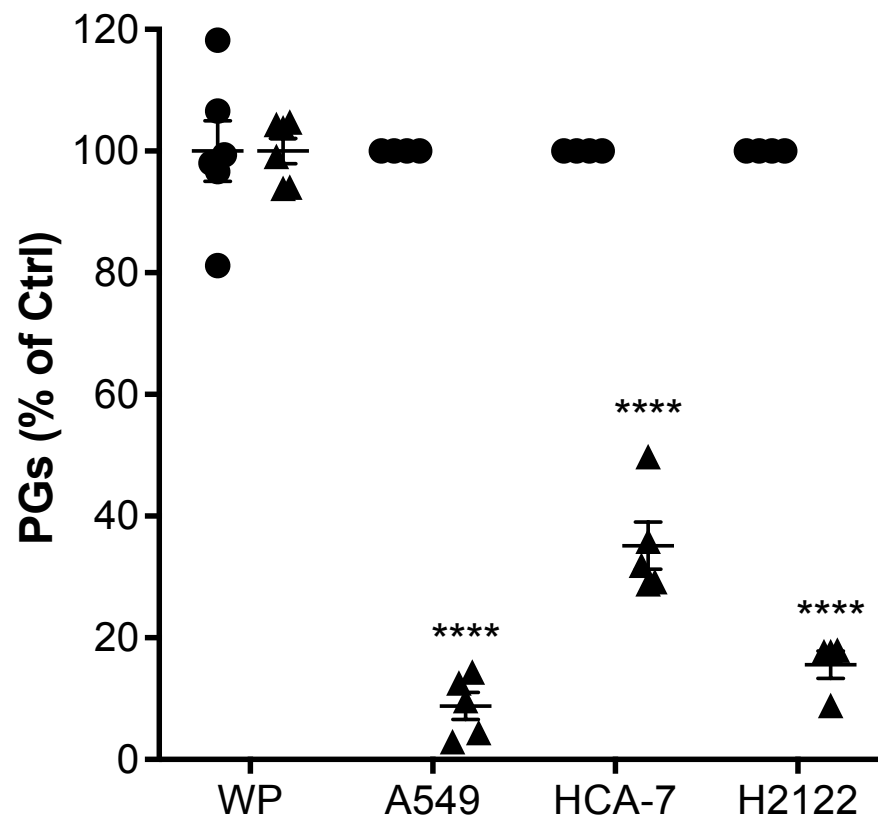

**Supplemental Fig S4.** Prostanoid inhibition by the COX-2 specific inhibitor valdecoxib. Washed platelets (WP), A549 and H2122 lung adenocarcinoma or HCA-7 colon adenocarcinoma cells were preincubated for 30 min with 100 nM valdecoxib (triangle) or vehicle (circle) prior addition of 2  $\mu$ M arachidonic acid. After 15 min, prostanoid production was measured by GC/MS. Values represent means  $\pm$  S.E.M., comparison between treatment and vehicle was performed using Holm-Sidak method (\*\*\*\*,  $P \leq 0.0001$  vs vehicle,  $n = 4$ ). Valdecoxib effect is non significant in washed platelets (WP).

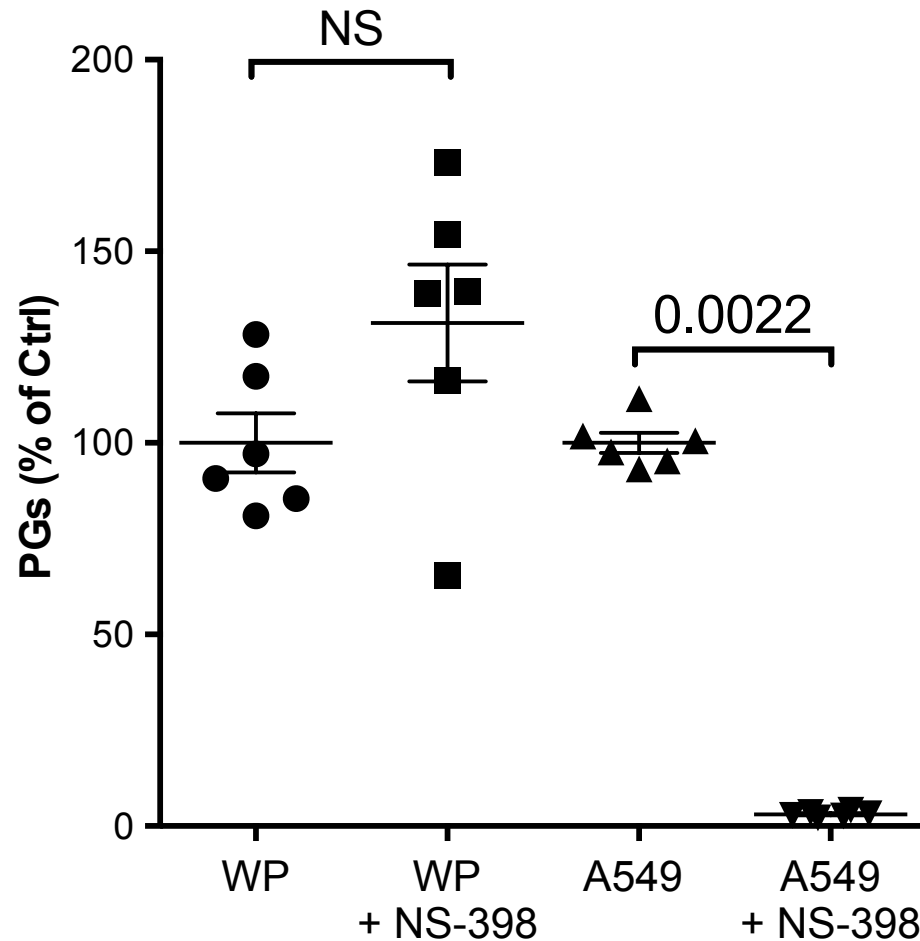

**Supplemental Fig S5.** Prostanoid inhibition by the COX-2 specific inhibitor NS-398. Cells were preincubated for 30 min with 100 nM NS-398 or vehicle prior addition of 2  $\mu$ M arachidonic acid. After 15 min, prostanoid production was measured by GC/MS. Values represent means  $\pm$  S.E.M., comparison between treatment and vehicle was performed using t-test.
